# Supplementary material
Source: PubMed Central journal article supplement (PMC3182272)
Supplement: neo1309_0792SD1.pdf [file neo1309_0792SD1.pdf]

**Table W1.** List of Applied Biosystems Assays Used.

| Common Gene Name            | AB Gene Designation       |
|-----------------------------|---------------------------|
| <i>β-catenin</i>            | CTNNB1-Hs00355049_m1      |
| <i>Carbonic Anhydrase 1</i> | CA1-Hs00266139_m1         |
| <i>CDX1</i>                 | CDX1-Hs00156451_m1        |
| <i>CDX2</i>                 | CDX2-Hs00230919_m1        |
| <i>Cox2</i>                 | PTGS2-Hs01573471_m1       |
| <i>Cyclin D1</i>            | CCND1-Hs00277039_m1       |
| <i>DRA</i>                  | SLC26A3-Hs00230798_m1     |
| <i>FILAGGRIN</i>            | FLG-Hs00863478_g1         |
| <i>HATH1/ATOH1</i>          | ATOH1-Hs00245453_s1       |
| <i>HES1</i>                 | HES1-Hs00172878_m1        |
| <i>Involucrin</i>           | IVL-Hs00846307_s1         |
| <i>KRT1</i>                 | KRT1-Hs00196158_m1        |
| <i>KRT10</i>                | KRT10-Hs00166289_m1       |
| <i>KRT13</i>                | KRT13-Hs00999762_m1       |
| <i>KRT14</i>                | KRT14-Hs00265033_m1       |
| <i>KRT15</i>                | KRT15-Hs00267035_m1       |
| <i>KRT16</i>                | KRT16-Hs00373910_g1       |
| <i>KRT17</i>                | KRT17-Hs01588578_m1       |
| <i>KRT18</i>                | KRT18-Hs01653110_s1       |
| <i>KRT19</i>                | KRT19-Hs00761767_s1       |
| <i>KRT20</i>                | KRT20-Hs00300643_m1       |
| <i>KRT4</i>                 | KRT4-Hs00361611_m1        |
| <i>KRT5</i>                 | KRT5-Hs00361185_m1        |
| <i>KRT7</i>                 | KRT7-Hs0059840_m1         |
| <i>KRT72</i>                | KRT72-Hs00603237_m1       |
| <i>KRT8</i>                 | KRT8-Hs01670053_m1        |
| <i>LORICRIN</i>             | LOR-Hs01894962_s1         |
| <i>MUC1</i>                 | MUC1-Hs00159357_m1        |
| <i>MUC12</i>                | MUC12-Hs00419779_m1       |
| <i>MUC13</i>                | MUC13-Hs00217230_m1       |
| <i>MUC15</i>                | MUC15-Hs00377336_m1       |
| <i>MUC16</i>                | MUC16-Hs01065189_m1       |
| <i>MUC17</i>                | MUC17-Hs00959753_s1       |
| <i>MUC2</i>                 | MUC2-Hs03005094_m1        |
| <i>MUC3A/3B</i>             | MUC3B;MUC3A-Hs03649367_mH |
| <i>MUC4</i>                 | MUC4-Hs00366414_m1        |
| <i>MUC5AC</i>               | MUC5AC-Hs01370716_m1      |
| <i>MUC5B</i>                | MUC5B-Hs00861588_m1       |
| <i>MUC6</i>                 | MUC6-Hs00401231_m1        |
| <i>NHE2</i>                 | SLC9A2-Hs00268166_m1      |
| <i>NOTCH1</i>               | NOTCH1-Hs01062014_m1      |
| <i>p63</i>                  | TP63-Hs00978340_m1        |
| <i>RETNLB</i>               | RETNLB-Hs00395669_m1      |
| <i>Sucrase Isomaltase</i>   | SI-Hs00356112_m1          |
| <i>Villin</i>               | VIL1-Hs00200229_m1        |

**Table W2.** Screening Comparison of Gene Expression between OTSTR.L and OTSTR.L.CatCLeF Cells by Applied Systems Quantitative PCR Array.

| Gene Name                   | Fold Change EPC.CatCLeF |
|-----------------------------|-------------------------|
| <i>β-catenin</i>            | 93.65                   |
| <i>KRT13</i>                | 43.56                   |
| <i>KRT4</i>                 | 19.44                   |
| <i>KRT15</i>                | 12.07                   |
| <i>NHE2</i>                 | 7.32                    |
| <i>KRT19</i>                | 5.96                    |
| <i>MUC4</i>                 | 5.23                    |
| <i>KRT7</i>                 | 4.96                    |
| <i>KRT10</i>                | 4.45                    |
| <i>NOTCH1</i>               | 4.35                    |
| <i>Cyclin D1</i>            | 3.77                    |
| <i>MUC5B</i>                | 3.35                    |
| <i>HES1</i>                 | 3.26                    |
| <i>MUC1</i>                 | 2.68                    |
| <i>Cox2</i>                 | 1.98                    |
| <i>Villin</i>               | 1.96                    |
| <i>MUC16</i>                | 1.95                    |
| <i>KRT18</i>                | 1.54                    |
| <i>KRT1</i>                 | 1.51                    |
| <i>KRT5</i>                 | 1.37                    |
| <i>KRT8</i>                 | 1.34                    |
| <i>MUC3A/3B</i>             | 1.21                    |
| <i>DRA</i>                  | 1.21                    |
| <i>MUC12</i>                | 1.21                    |
| <i>MUC2</i>                 | 1.21                    |
| <i>MUC5AC</i>               | 1.21                    |
| <i>MUC6</i>                 | 1.21                    |
| <i>RETNLB</i>               | 1.21                    |
| <i>Sucrase Isomaltase</i>   | 1.21                    |
| <i>CDX2</i>                 | 1.21                    |
| <i>KRT17</i>                | 1.20                    |
| <i>KRT16</i>                | 1.16                    |
| <i>p63</i>                  | 1.10                    |
| <i>HATH1/ATOH1</i>          | 1.07                    |
| <i>Carbonic Anhydrase 1</i> | 1.01                    |
| <i>Involucrin</i>           | -1.03                   |
| <i>KRT14</i>                | -1.14                   |
| <i>KRT72</i>                | -1.15                   |
| <i>KRT20</i>                | -1.26                   |
| <i>MUC17</i>                | -1.47                   |
| <i>CDX1</i>                 | -2.22                   |
| <i>MUC15</i>                | -2.96                   |
| <i>MUC13</i>                | -6.06                   |
| <i>FILAGGRIN</i>            | -10.13                  |
| <i>LORICRIN</i>             | -37.22                  |

Shaded data indicate genes that are two-fold different from controls.

**Table W3.** Screening Comparison of Gene Expression between OTSTR.M and OTSTR.M.Cox2 Cells by Applied Systems Quantitative PCR Array.

| Gene Name                   | Fold Change EPC.COX2 |
|-----------------------------|----------------------|
| <i>MUC17</i>                | 28.48                |
| <i>Cox2</i>                 | 28.31                |
| <i>HATH1/ATO1</i>           | 13.43                |
| <i>MUC1</i>                 | 11.07                |
| <i>MUC5B</i>                | 9.41                 |
| <i>MUC3A/3B</i>             | 5.49                 |
| <i>KRT7</i>                 | 4.08                 |
| <i>KRT19</i>                | 2.05                 |
| <i>β-catenin</i>            | 1.81                 |
| <i>Cyclin D1</i>            | 1.55                 |
| <i>Villin</i>               | 1.37                 |
| <i>DRA</i>                  | 1.37                 |
| <i>MUC12</i>                | 1.37                 |
| <i>MUC2</i>                 | 1.37                 |
| <i>MUC5AC</i>               | 1.37                 |
| <i>MUC6</i>                 | 1.37                 |
| <i>RETNLB</i>               | 1.37                 |
| <i>Sucrase isomaltase</i>   | 1.37                 |
| <i>KRT8</i>                 | 1.32                 |
| <i>HES1</i>                 | 1.29                 |
| <i>p63</i>                  | 1.28                 |
| <i>Involucrin</i>           | 1.16                 |
| <i>NOTCH1</i>               | 1.15                 |
| <i>KRT72</i>                | 1.06                 |
| <i>KRT16</i>                | -1.14                |
| <i>MUC16</i>                | -1.18                |
| <i>KRT18</i>                | -1.20                |
| <i>KRT15</i>                | -1.33                |
| <i>MUC13</i>                | -1.59                |
| <i>KRT17</i>                | -1.61                |
| <i>KRT20</i>                | -1.76                |
| <i>CDX1</i>                 | -1.98                |
| <i>CDX2</i>                 | -2.03                |
| <i>KRT4</i>                 | -2.15                |
| <i>KRT5</i>                 | -3.41                |
| <i>MUC15</i>                | -4.78                |
| <i>FILAGGRIN</i>            | -4.80                |
| <i>Carbonic Anhydrase 1</i> | -5.17                |
| <i>KRT14</i>                | -5.31                |
| <i>KRT13</i>                | -6.00                |
| <i>MUC4</i>                 | -8.00                |
| <i>NHE2</i>                 | -9.07                |
| <i>KRT10</i>                | -12.98               |
| <i>LORICRIN</i>             | -13.23               |
| <i>KRT1</i>                 | -15.38               |

Shaded data indicate genes that are two-fold different from controls.
